# Supplementary material for: The distribution of active RNA polymerase II along the transcribed region is gene-specific and controlled by elongation factors
Source: PubMed Central journal article supplement — Nucleic Acids Res. 2010 Apr 12;38(14):4651–64. doi: 10.1093/nar/gkq215 (PMC2919717; doi:10.1093/nar/gkq215), 2010-04-12
Supplement: gkq215_1.pdf [file gkq215_1.pdf]

**A**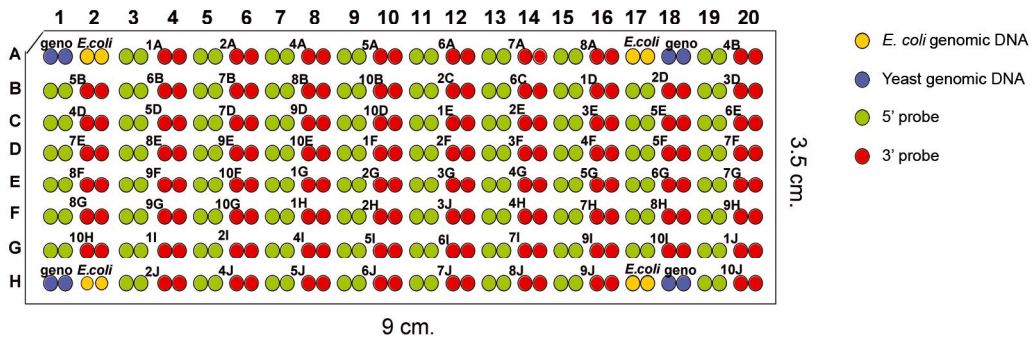**B**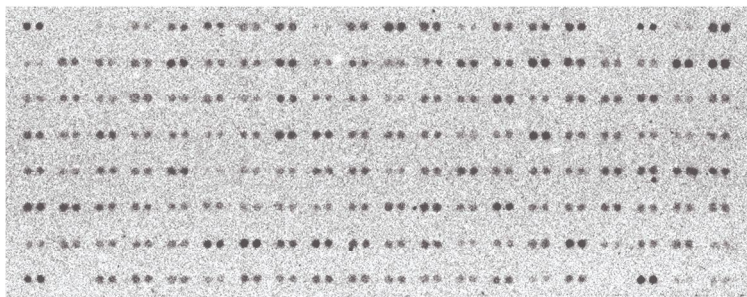

Figure S1

**A**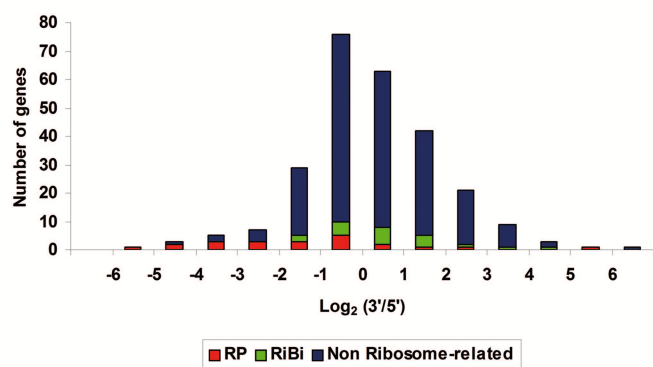**B**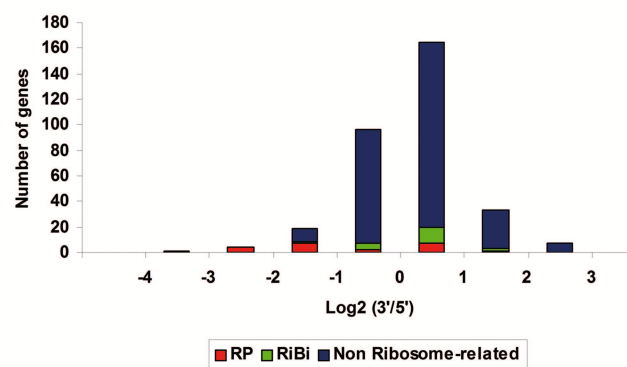**C**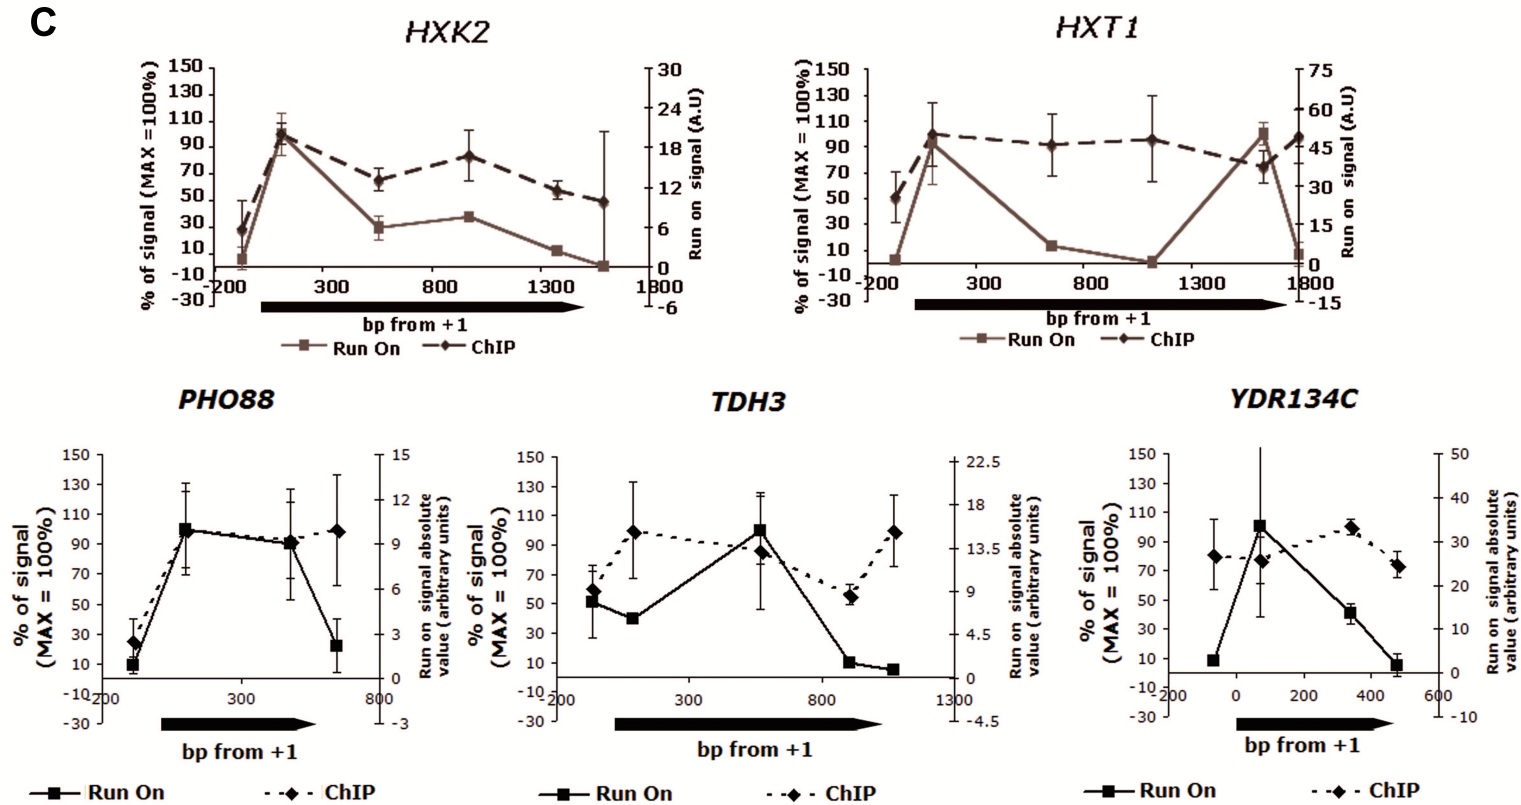**Figure S2**

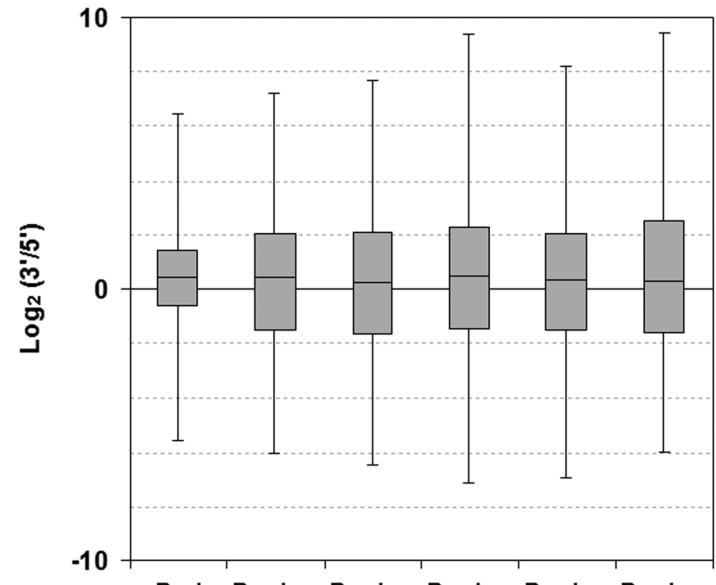

|                    | Real | Random 1              | Random 2              | Random 3              | Random 4              | Random 5              |
|--------------------|------|-----------------------|-----------------------|-----------------------|-----------------------|-----------------------|
| VARIANCE           | 3.07 | 7.63                  | 8.77                  | 7.76                  | 7.93                  | 8.60                  |
| F SNEDECOR P VALUE |      | $3.87 \cdot 10^{-14}$ | $3.85 \cdot 10^{-18}$ | $1.17 \cdot 10^{-14}$ | $2.95 \cdot 10^{-15}$ | $1.41 \cdot 10^{-17}$ |

Figure S3

**A**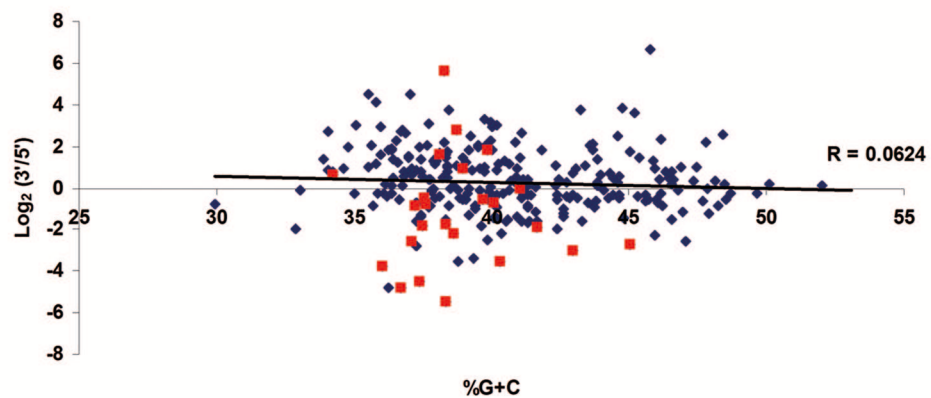**B**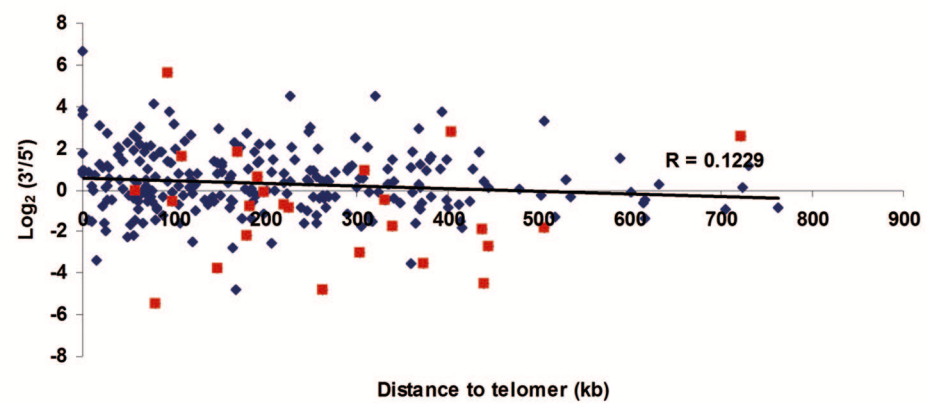**C**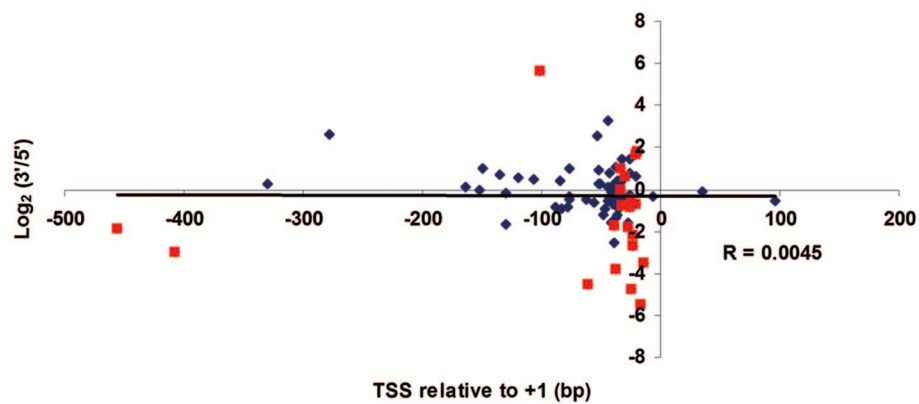**D**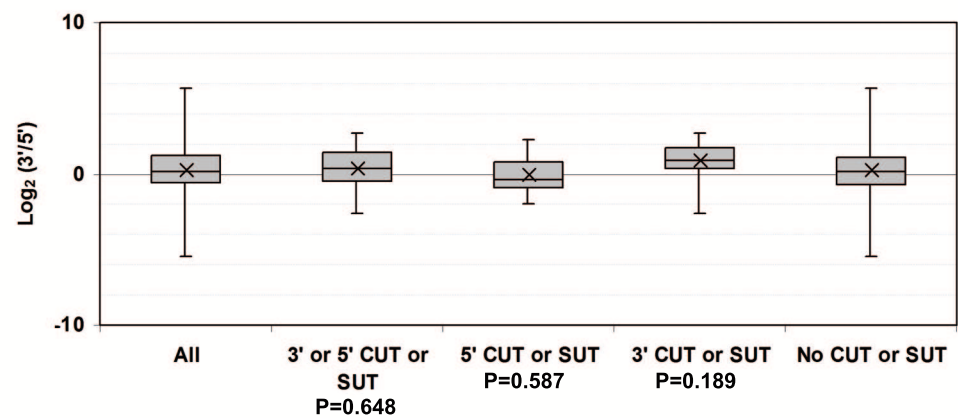**Figure S4**

**E**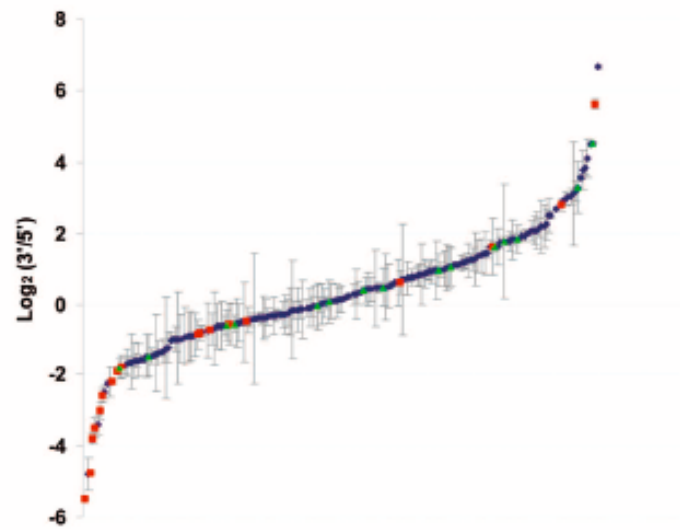**F**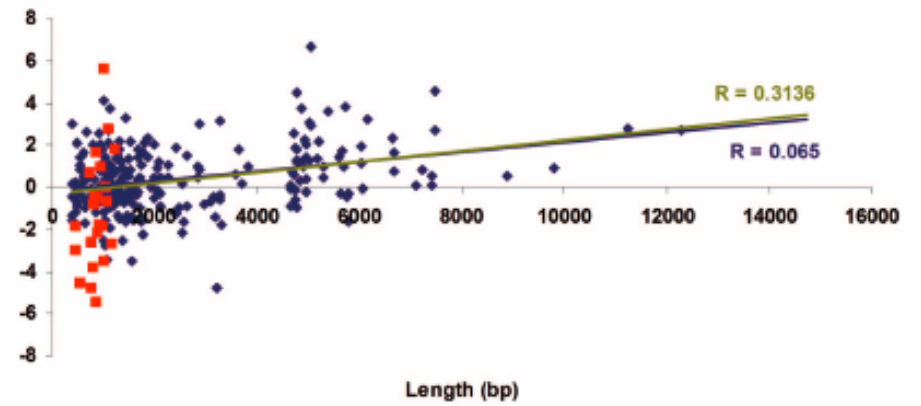**G**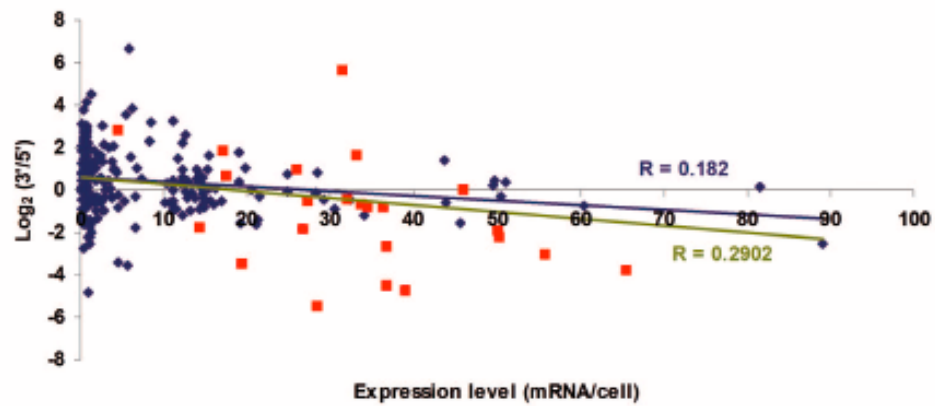**H**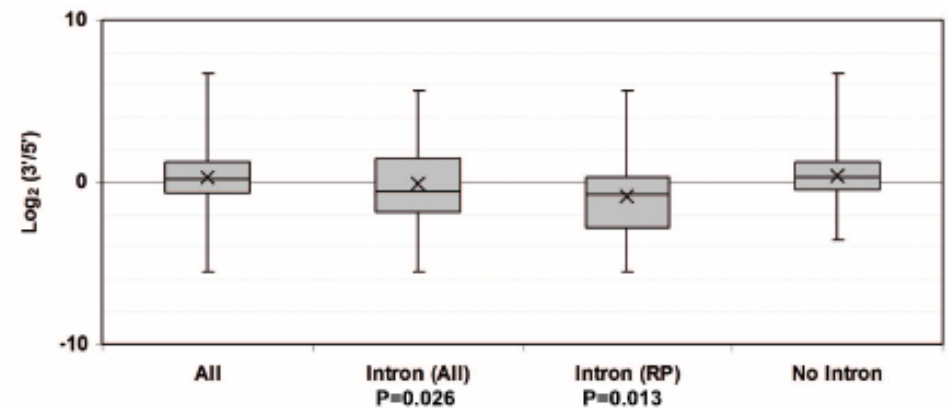**Figure S4**

**A**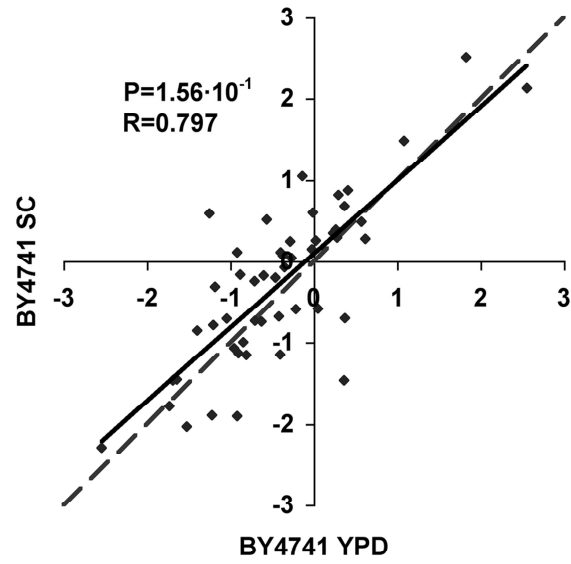**B**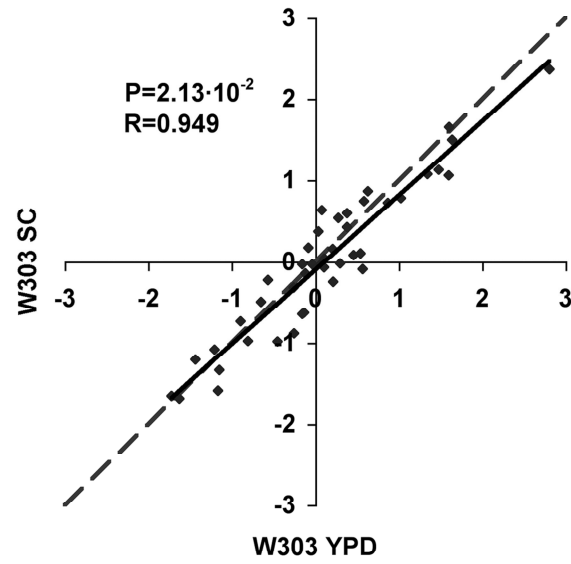**C**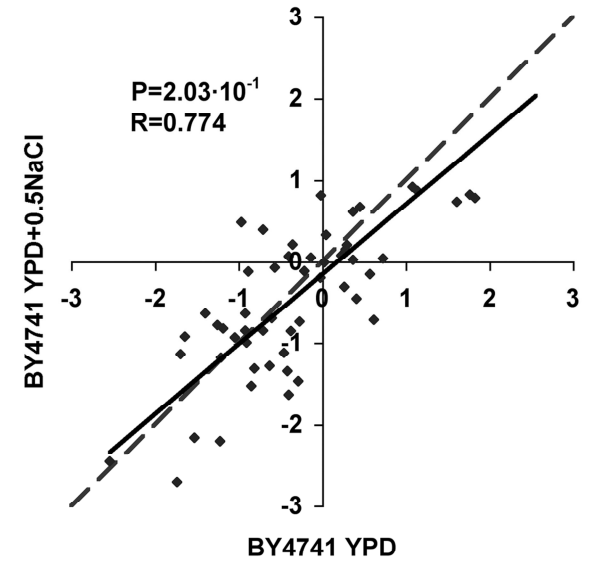**D**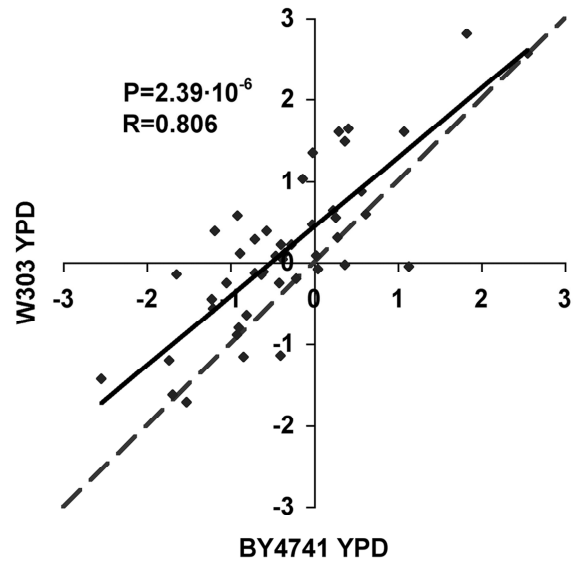**E**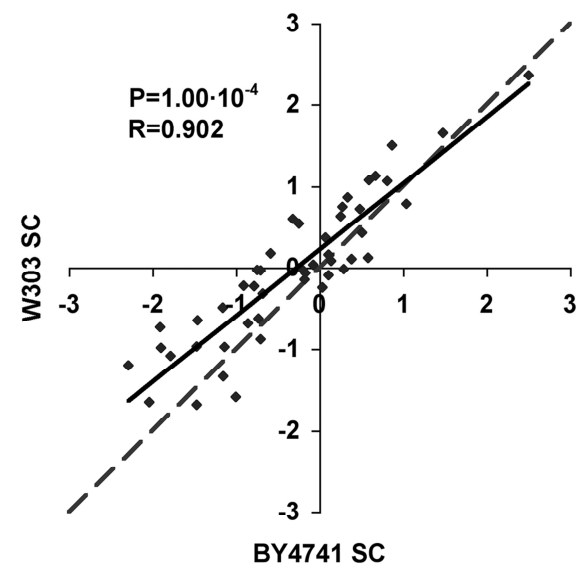**Figure S5**

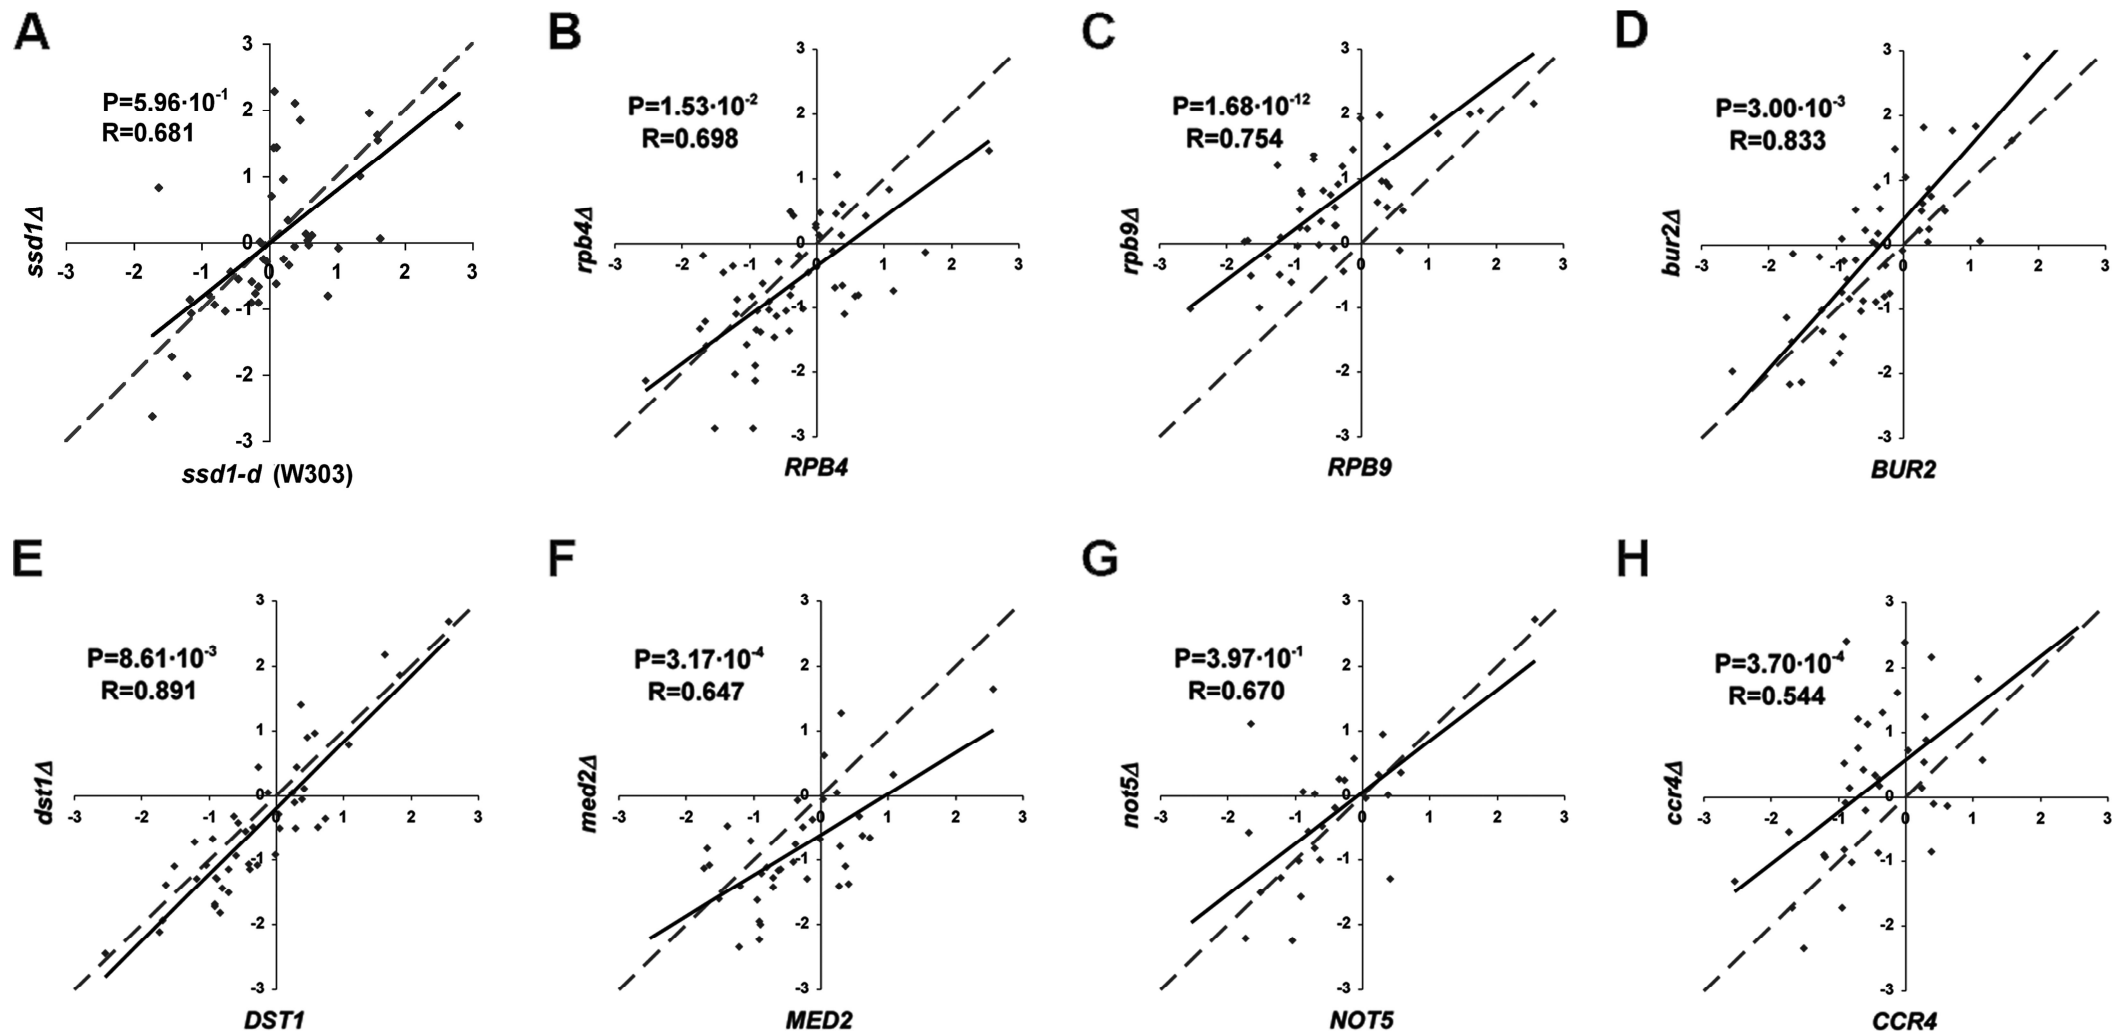

**Figure S6**

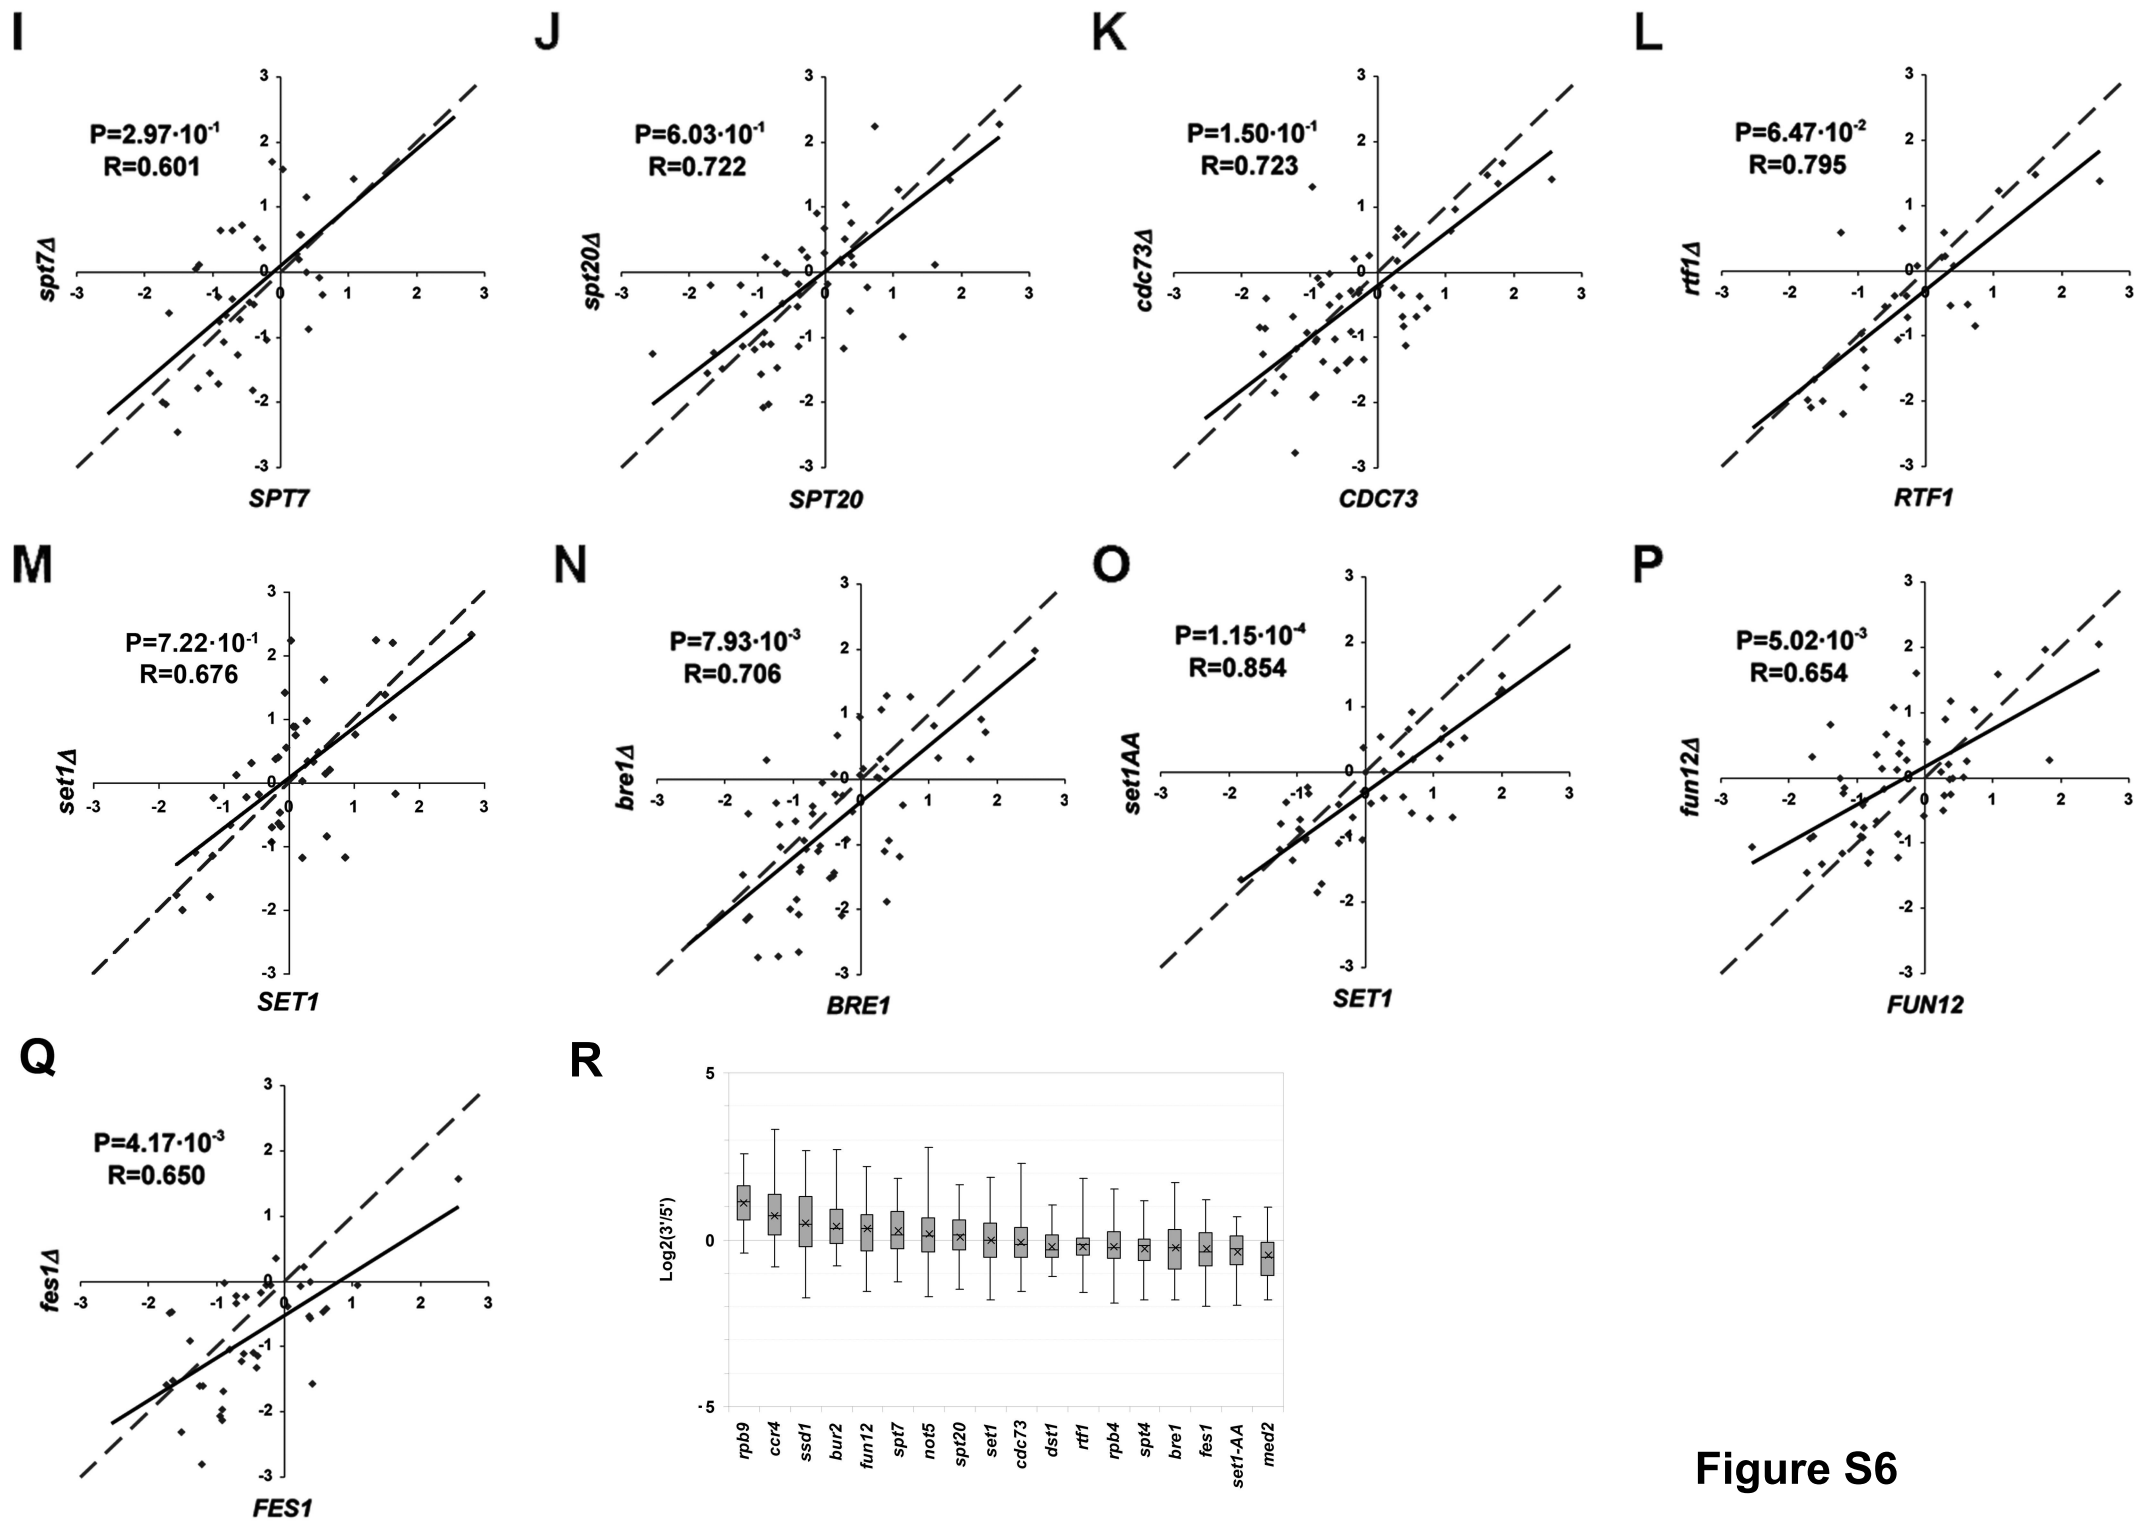

**Figure S6**



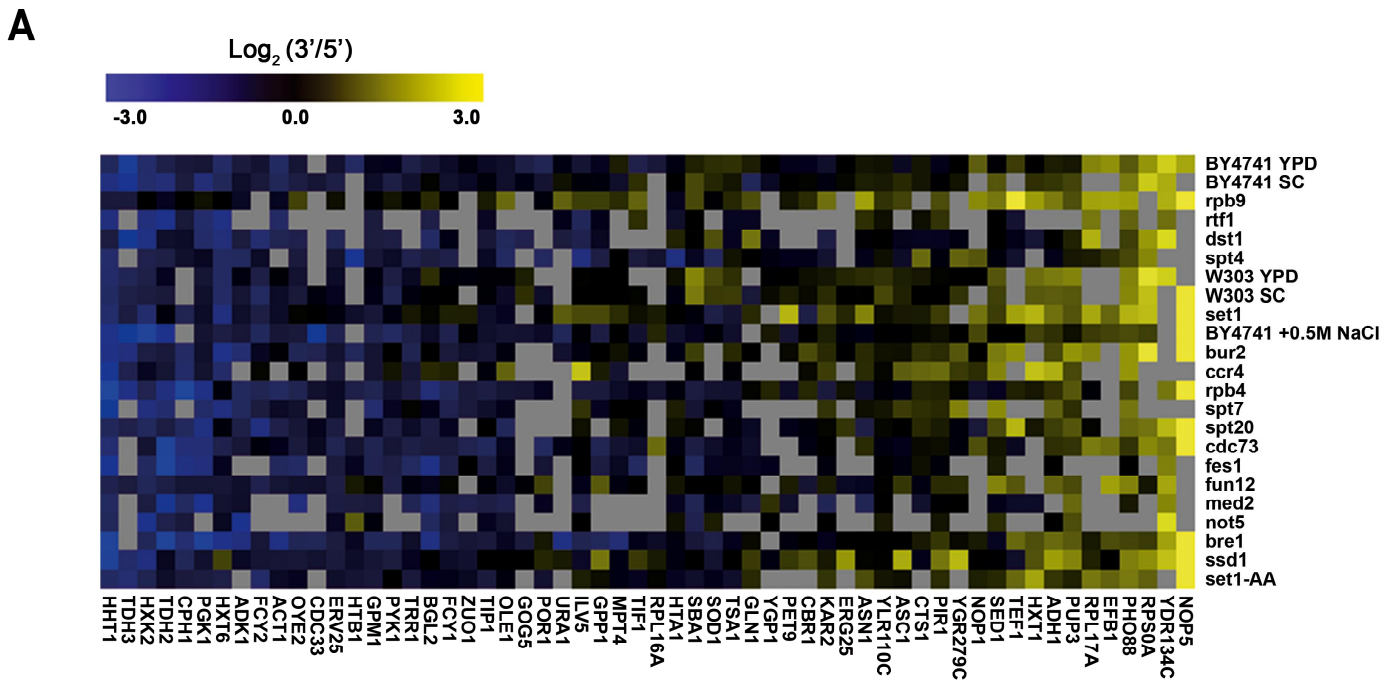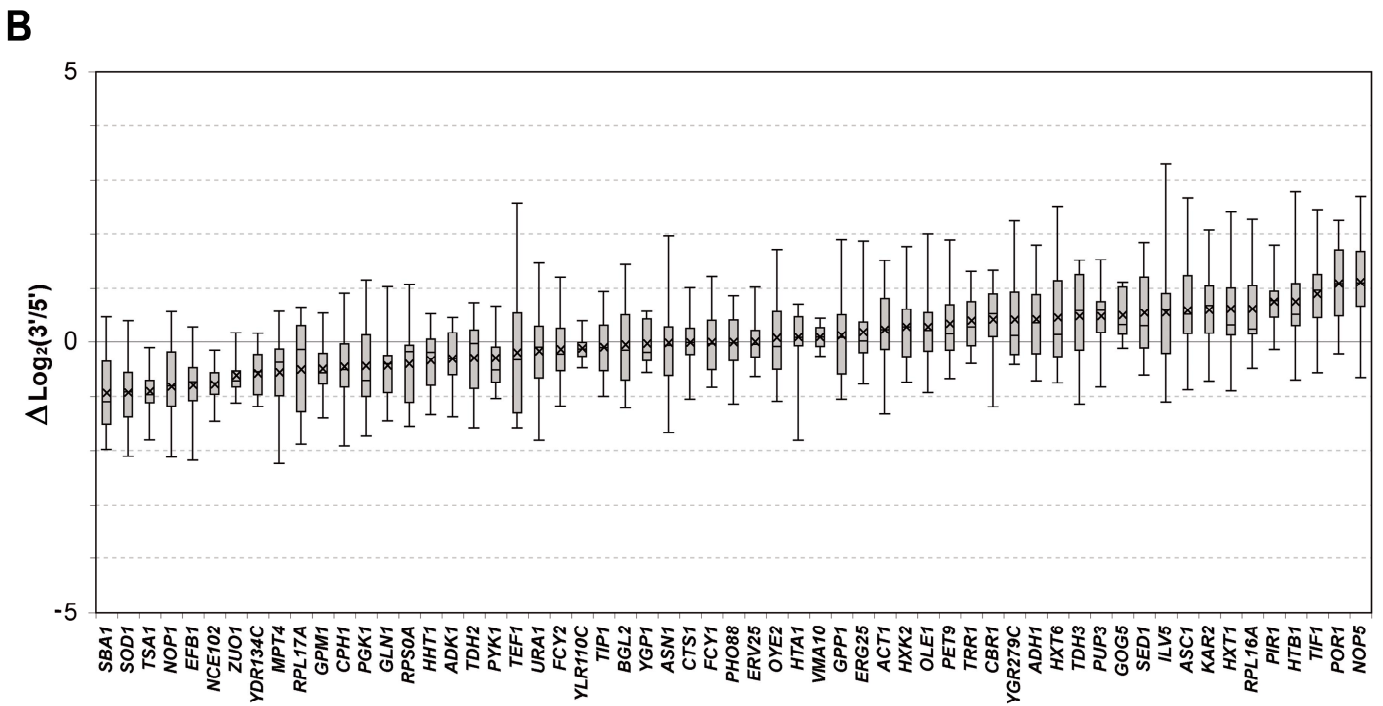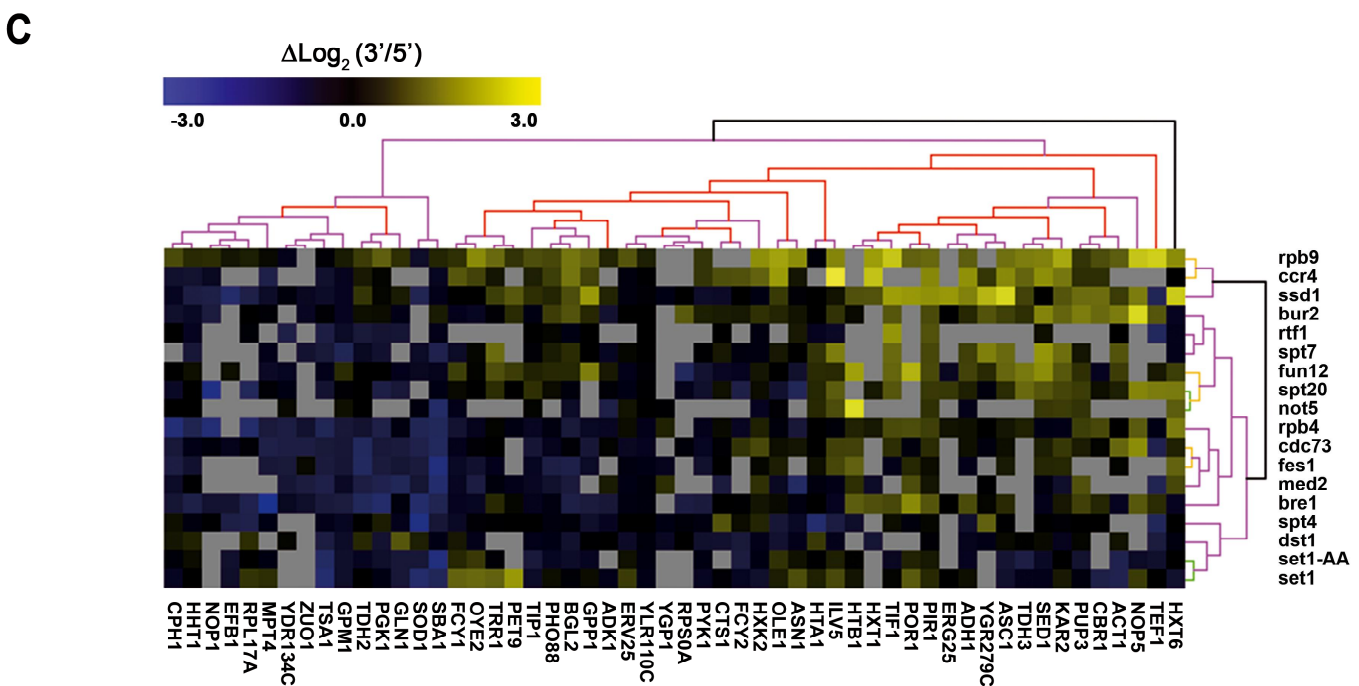

Figure S7
