# Supplementary material for: The distribution of active RNA polymerase II along the transcribed region is gene-specific and controlled by elongation factors
Source: PubMed Central journal article supplement — Nucleic Acids Res. 2010 Apr 12;38(14):4651–64. doi: 10.1093/nar/gkq215 (PMC2919717; doi:10.1093/nar/gkq215), 2010-04-12
Supplement: gkq215_2.pdf [file gkq215_2.pdf]

**Table SII**

| <b>Probe</b>     | <b>Length (bp)</b> | <b>Start regarding the ORF +1</b> | <b>End regarding the ORF +1</b> | <b>Forward primer</b>        | <b>Reverse primer</b>         |
|------------------|--------------------|-----------------------------------|---------------------------------|------------------------------|-------------------------------|
| HXK2 promoter    | 217                | -182                              | 35                              | TGCACCTTCGCCACTGTCTTATCTACAA | TGGCTTGTGGTTTTTTTGGACCTAAATG  |
| HXK2 5'          | 146                | 34                                | 180                             | AGAAAGGGTTCCATGGCCGATG       | CCCTTCTTGGACAAAACCCTTTTCC     |
| HXK2 ORF2        | 194                | 460                               | 654                             | GGTTTCACCTTTTCTTTCCAGCT      | GCAACCAAAGTACCGGTAGTGTCTG     |
| HXK2 ORF3        | 174                | 886                               | 1060                            | CCAGGCCAACAAACCTTTGAAA       | ATCTTCCTCGATTCTGGCTGGG        |
| HXK2 3'          | 139                | 1309                              | 1448                            | GACATTTACGGCTGGACTCAAA       | TACCAACGGACTTACCTTCAGC        |
| HXK2 3'UTR       | 219                | 1483                              | 1702                            | TGAACAACAAGAAGGTGCCCTTTTC    | AAGCAAGAGAAAAAACGAGCAATTGTT   |
| HXT1 promoter    | 175                | -157                              | 18                              | CCCCCTCACGTTTTTAATCATTTGAAT  | TCGGGAGTTGAATTCATGATTTTACGT   |
| HXT1 5'          | 151                | 27                                | 178                             | TCCTCAGAAATCCAATTCATCCAAC    | TTTTCCGGTGTGGAGGGG            |
| HXT1 ORF2        | 167                | 570                               | 737                             | GCTAATATCTGAGGTCGCCCC        | CCCAGGCGAAACACAAACCTAA        |
| HXT1 ORF3        | 163                | 1037                              | 1200                            | ACGGTACCATTGTTTTCCAGGC       | CAGCAGACCATAACCGACAGCAC       |
| HXT1 3'          | 121                | 1575                              | 1696                            | TGATATGTACGCCGAAGGTGTTCTACC  | ACTCTTGTAATAATGGTTGGTCATCATGC |
| HXT1 3'UTR       | 192                | 1702                              | 1894                            | AGCAGGAAATAAACTAAACAAGCTCAAT | TGCCAGAATGAAATTTCTTGTTCC      |
| PHO88 promoter   | 169                | -171                              | -2                              | TCTTTCTTTTTTGGCGGCCGGT       | GGGCTGCTCGGTTCTCTTGTGC        |
| PHO88 5'         | 131                | 35                                | 166                             | TGGTCATGATGCAACTCTCCCG       | AACAATTCTTTCTGGCCATTGG        |
| PHO88 3'         | 133                | 412                               | 545                             | AATCACCTCTTCGTAAGCCTG        | TACCGCTCTTTCAGCTTCTTC         |
| PHO88 3'UTR      | 174                | 558                               | 732                             | GGCTGAATGATTCGATCAAAAGCG     | AAAAAAGCAATTCTATGGCGATGTAGGA  |
| TDH3 promoter    | 221                | -178                              | 43                              | CCAGTTCCTGAAATTATTCCCCT      | TCTACCGATTCTACCGAAACCGTT      |
| TDH3 5'          | 158                | 8                                 | 166                             | GAGTTGCTATTAACGGTTTCGG       | AGCGTATCTACCGTGAGTGGAG        |
| TDH3 ORF2        | 180                | 477                               | 657                             | CAAGGTTATCAACGATGCTTTC       | AAGACCTTACCGACAGCCTTAG        |
| TDH3 3'          | 154                | 828                               | 982                             | AGACGCTGTTGTCTCCTCTGAC       | TTCAACCAAGTCGACAACCTCTG       |
| TDH3 3'UTR       | 183                | 978                               | 1161                            | TGAACACGTTGCCAAGGCTTAAGTGA   | TGGCGAAAAAGACAAGAACAATGCAA    |
| YDR134C promoter | 183                | -156                              | 27                              | AACCGTTGCTGGATCGTGGTTG       | CAACAGCGGCAATAGCAGCGAT        |
| YDR134C 5'       | 126                | 7                                 | 133                             | TTCTCTACCGTCGCTTCTATCG       | AACGTGGTCCTACAAGAAGTG         |
| YDR134C 3'       | 147                | 264                               | 411                             | AACTGAAAAGCCAACCGAAAAG       | TACAACAATAAAGCGGCAGCAC        |
| YDR134C 3'UTR    | 180                | 387                               | 567                             | TGGTGCTGCCGCTTTATTGTTG       | AAACATTTAGTTATGGAGTGTGCCTCCT  |
