# Supplementary material for: The distribution of active RNA polymerase II along the transcribed region is gene-specific and controlled by elongation factors
Source: PubMed Central journal article supplement — Nucleic Acids Res. 2010 Apr 12;38(14):4651–64. doi: 10.1093/nar/gkq215 (PMC2919717; doi:10.1093/nar/gkq215), 2010-04-12
Supplement: gkq215_3.pdf [file gkq215_3.pdf]

**Table SIII**

| <b>Oligo</b>             | <b>Sequence</b>                         |
|--------------------------|-----------------------------------------|
| HXK2 promoter Q-PCR F    | GCACCTTCGCCACTGTCTTATC                  |
| HXK2 promoter Q-PCR R    | GGGTAGGATTACTCTTTTTTATAGTTTTGTAGAT      |
| HXK2 5' Q-PCR F          | AACTGAAACTTTACAAGCCGTTACC               |
| HXK2 5' Q-PCR R          | TTTTCCAATTTCGAAATGAAGTG                 |
| HXK2 ORF2 Q-PCR F        | GAAAACCACGATGTTGTTCCAA                  |
| HXK2 ORF2 Q-PCR R        | ATCCTCTTAGTGATTTGCTTTTGC                |
| HXK2 ORF3 Q-PCR F        | GCGTTTGGCCTTGATGGA                      |
| HXK2 ORF3 Q-PCR R        | TGGTCTTGAAGATGAAACCTTGTT                |
| HXK2 3' Q-PCR F          | AAACCTCACTAGACGACTACCCAATC              |
| HXK2 3' Q-PCR R          | AACCATCTTCAGCAGGAACAATCT                |
| HXK2 3'UTR Q-PCR F       | AATATGACGATTTATGAAATCTACATGATTT         |
| HXK2 3'UTR Q-PCR R       | AACGAGCAATTGTTAAAAGAAACTAAAA            |
| HXT1 promoter Q-PCR F    | AAGGCAACAATGTCCCCATAAT                  |
| HXT1 promoter Q-PCR R    | GAAAGAACATGAGACCCCAGATG                 |
| HXT1 5' Q-PCR F          | TCAGAAATCCAATTCATCCAACCTC               |
| HXT1 5' Q-PCR R          | TTTGAACGACCAGATTCCAATTC                 |
| HXT1 ORF2 Q-PCR F        | TGAAATGAGAGGCACCTTGGT                   |
| HXT1 ORF2 Q-PCR R        | CCTAAAGTAATCATGACTTGGTAACATGAA          |
| HXT1 ORF3 Q-PCR F        | CTCTGTACACCGTTGACCGTTTT                 |
| HXT1 ORF3 Q-PCR R        | CACCCACATCAAACAGTTACG                   |
| HXT1 3' Q-PCR F          | TGATATGTACGCCGAAGGTGTT                  |
| HXT1 3' Q-PCR R          | GGAACCCAGGAAGCTGATTTC                   |
| HXT1 3'UTR Q-PCR F       | AACAAAATTCTTGTCAAATTCATAAACAG           |
| HXT1 3'UTR Q-PCR R       | CAAGAACTAGCAAAGAAAAGAACATCTG            |
| PHO88 promoter Q-PCR F   | GCGCCAAAACCGAAACG                       |
| PHO88 promoter Q-PCR R   | CGAATGAAAGAGCAAGGCAACTA                 |
| PHO88 5' Q-PCR F         | AGGACCCAACCATCATCATGTAC                 |
| PHO88 5' Q-PCR R         | GATACCGATGGAAGAACAGTATAAAATTC           |
| PHO88 3' Q-PCR F         | CCTCTTCGGTAAGCCTGCAA                    |
| PHO88 3' Q-PCR R         | GGAGCCTTGAATGGTCTCTTCA                  |
| PHO88 3'UTR Q-PCR F      | AATAGAATGAAATAAGATAAAGCTAGACGAATT       |
| PHO88 3'UTR Q-PCR R      | GGCGATGTAGGAAAATAGACACAAT               |
| TDH3 promoter Q-PCR F    | CAAGAACTTAGTTTCGAATAAACACACAT           |
| TDH3 promoter Q-PCR R    | GCAACTCTAACCATTTTGTGTTTATG              |
| TDH3 5' Q-PCR F          | CCAAACGTCGAAGTTGTTGCT                   |
| TDH3 5' Q-PCR R          | CGTAGTCGTTGGTGATGAATGG                  |
| TDH3 ORF2 Q-PCR F        | CCACTGTCCACTCTTTGACTGCTA                |
| TDH3 ORF2 Q-PCR R        | GGGATGGACCGTCAACAGTCT                   |
| TDH3 3' Q-PCR F          | TCGATGCTTCCGCTGGTATC                    |
| TDH3 3' Q-PCR R          | AGACCAACTTGACGAACTTTGGA                 |
| TDH3 3'UTR Q-PCR F       | TGACATTTTCGATTCATTGATTGAA               |
| TDH3 3'UTR Q-PCR R       | AGCGCATCAAGAAAAACACAA                   |
| YDR134C promoter Q-PCR F | TTCGTTTCGTTCAAAAATAACTACAA              |
| YDR134C promoter Q-PCR R | CGACGGTAGAGAATTGCATTTTTA                |
| YDR134C 5' Q-PCR F       | CCTCCGCCGCTTCTAACAT                     |
| YDR134C 5' Q-PCR R       | TGGTAGATTCTTCTGTGACAGTAGCA              |
| YDR134C 3' Q-PCR F       | CAACAAGGTTCTAGCACTCAAACCTG              |
| YDR134C 3' Q-PCR R       | CAGCTGGCAAAGCCTTAACAG                   |
| YDR134C 3'UTR Q-PCR F    | AATACAGCTTCCACAAAATCGTTTT               |
| YDR134C 3'UTR Q-PCR R    | CTAGAATTAGAATAAGAAATTACCAGAATATCTTATTAA |
| Intergenic Chr. V F      | TGTTCCTTTAAAGAGGTGATGGTGAT              |
| Intergenic Chr. V R      | GTGCGCAGTACTTGTGAAAACC                  |
